# Supplementary material for: Newcastle disease burden in Nepal and efficacy of Tablet I2 vaccine in commercial and backyard poultry production
Source: PubMed Central journal article supplement (PMC10004539; doi:10.1371/journal.pone.0280688), 2023-03-10

Figure 7 a) Top Image Commercial Farm PCR result on elctrophoresis Raw Image

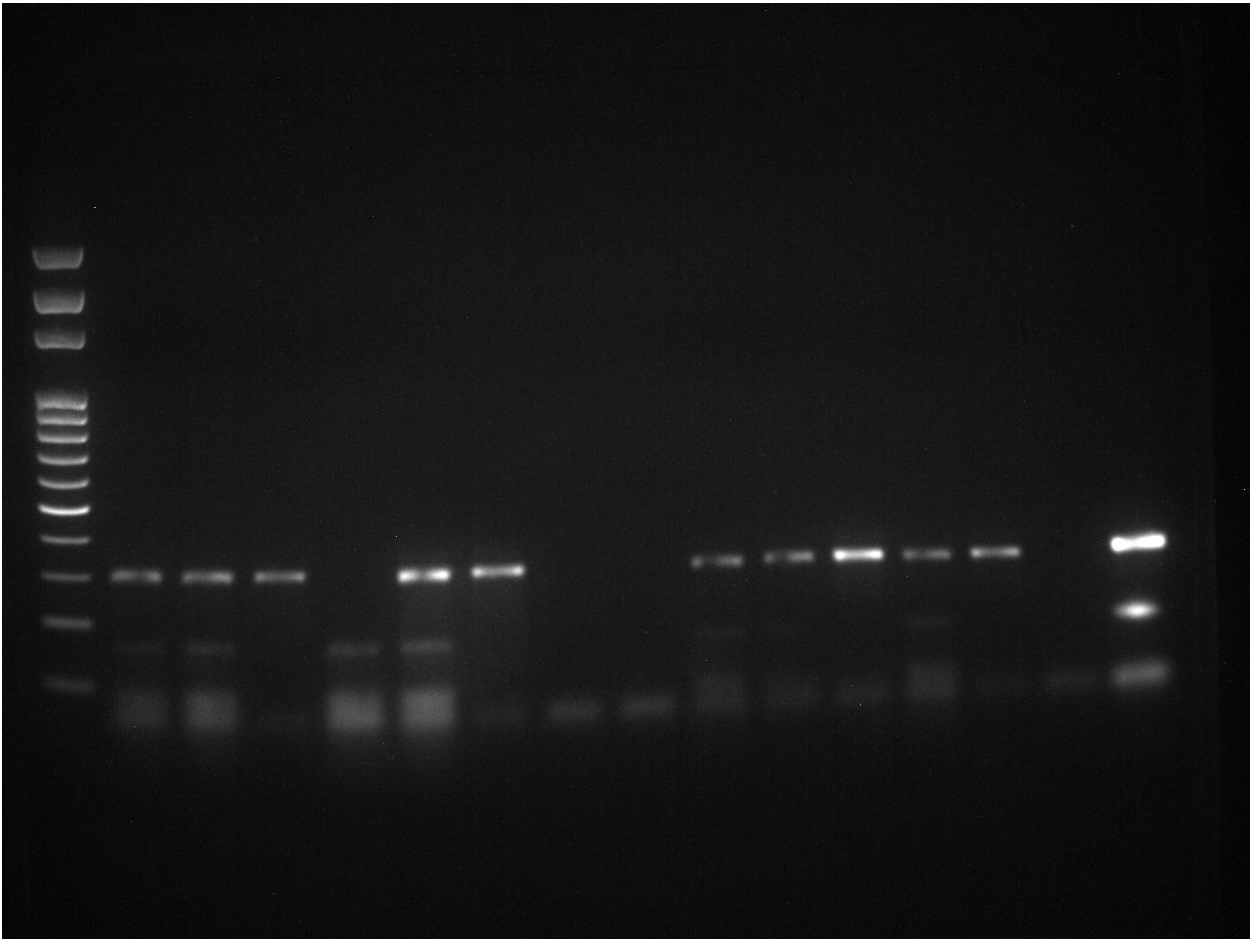

Figure 7 b) Middle Image Commercial Farm PCR result on elctrophoresis Raw iIMAGE

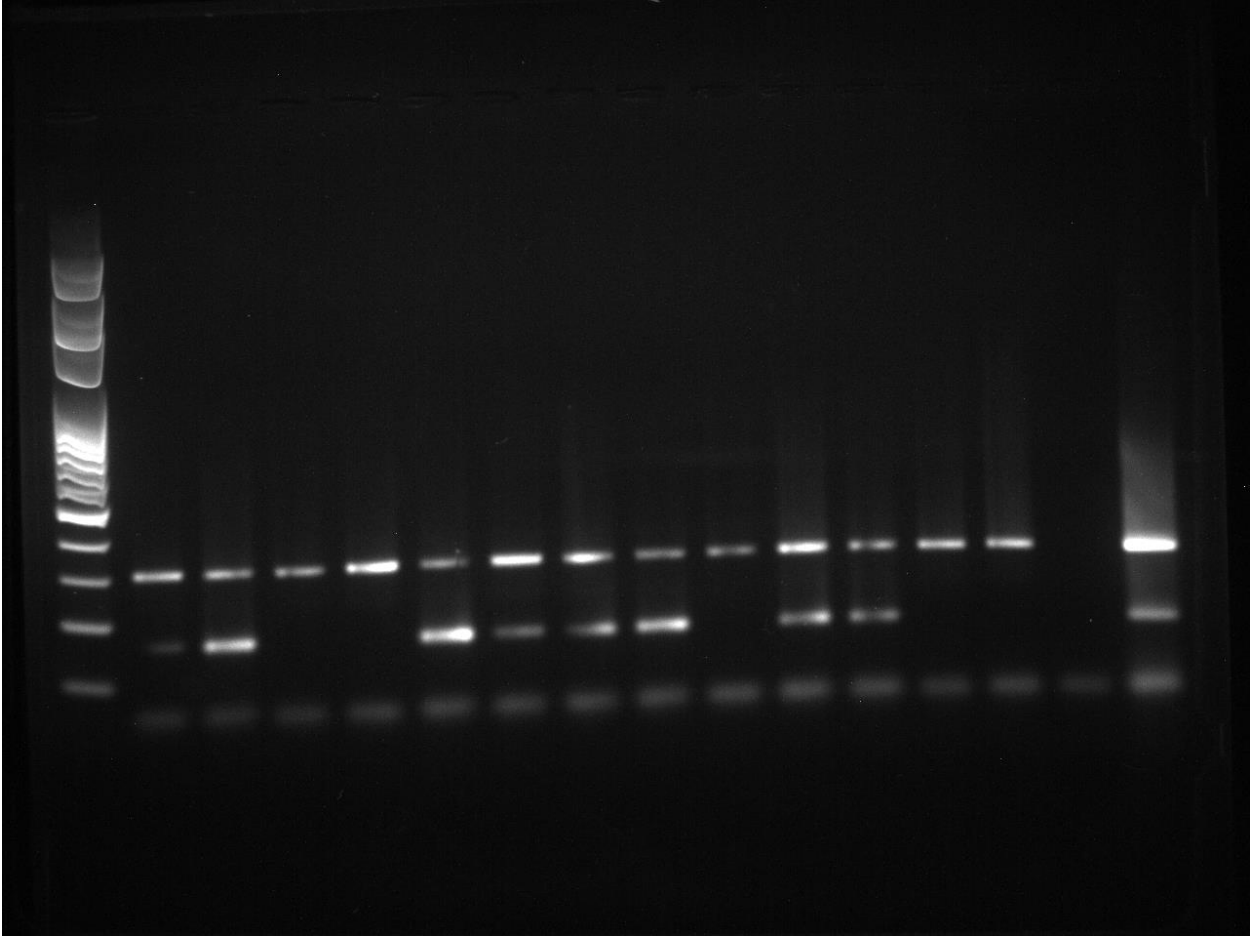

Figure 7 c) Bottom Image Commercial Farm PCR result on elctrophoresis Raw iMAGE

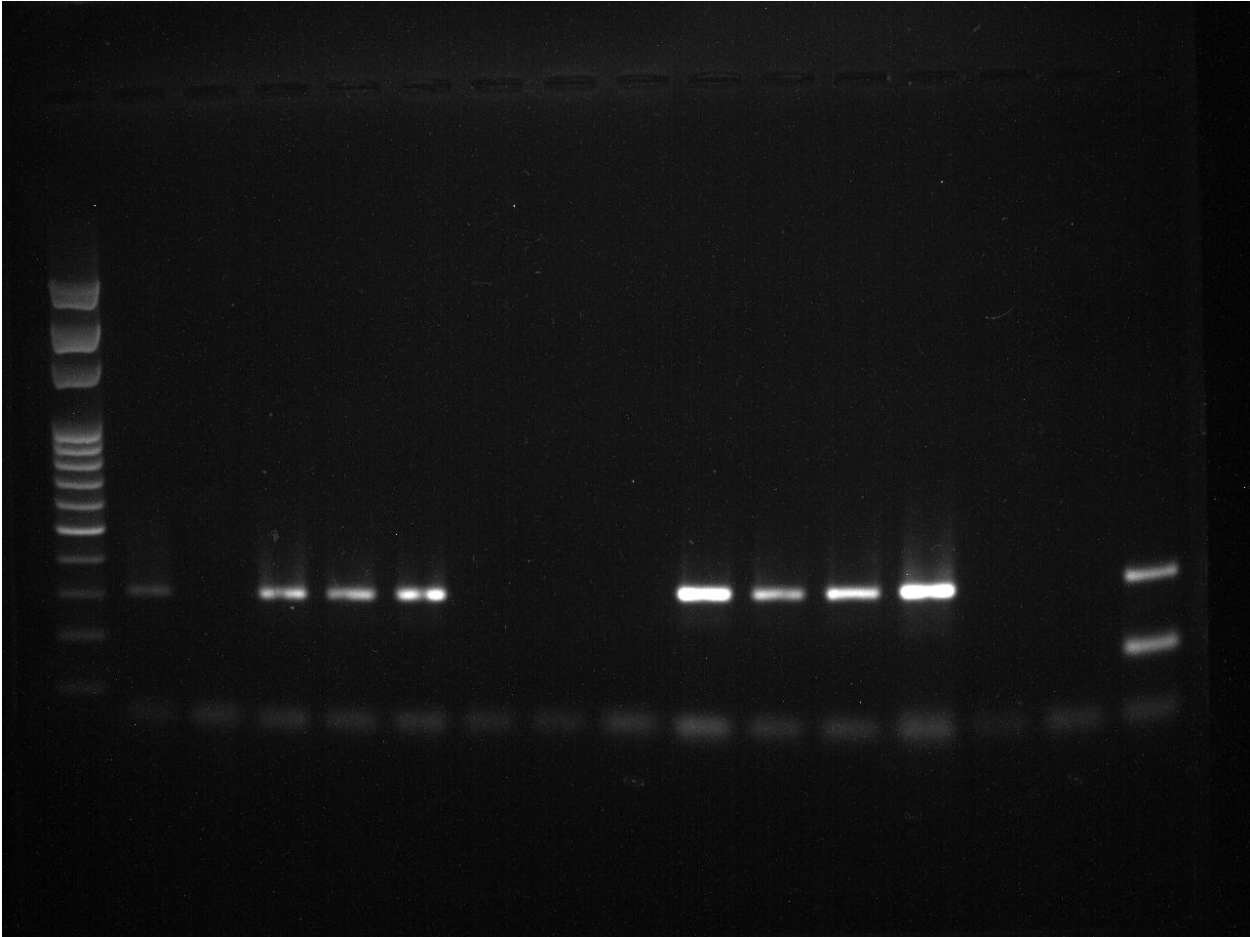

Figure 8 a) Top Image Backyard Farm PCR result on elctrophoresis Raw iMAGE

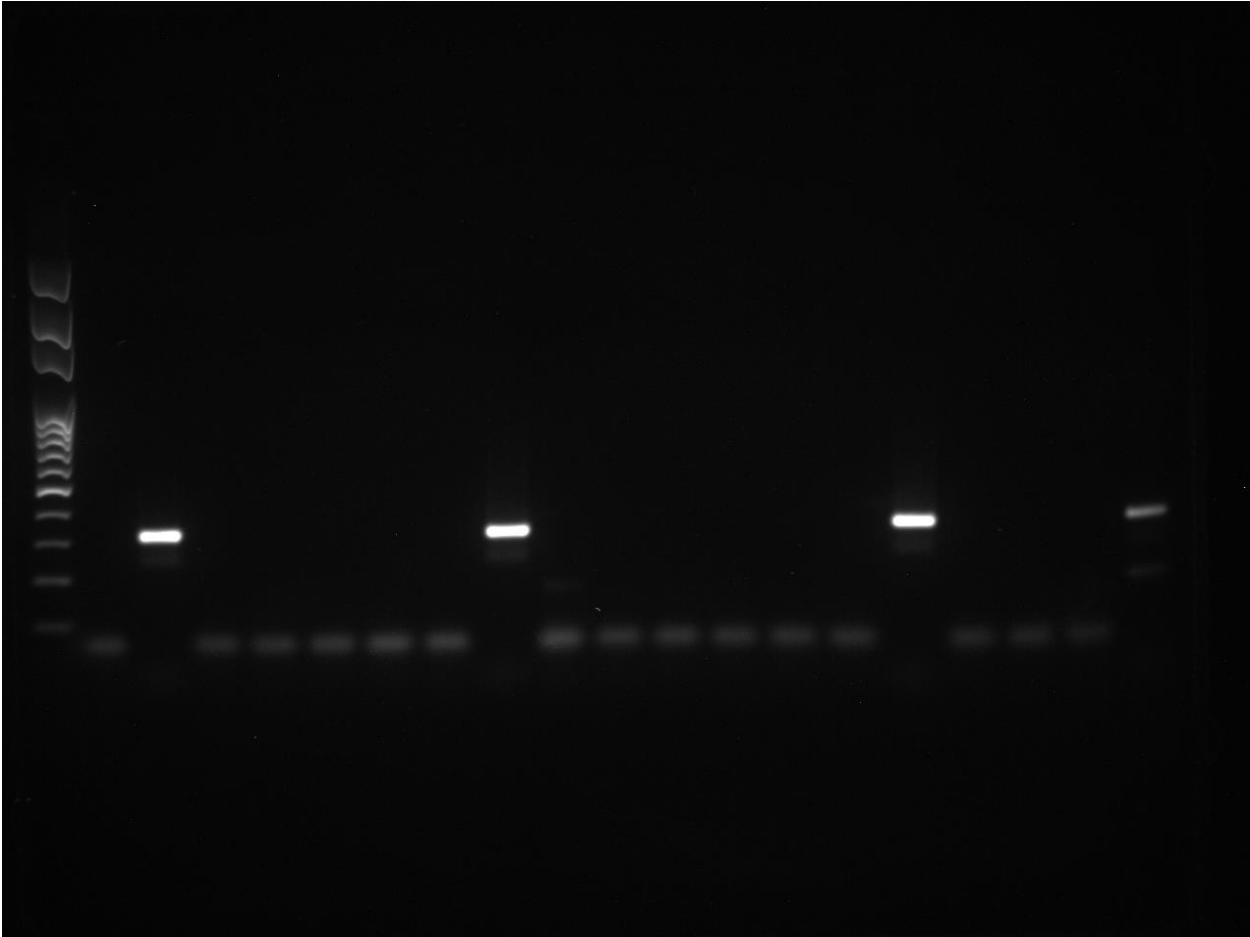

Figure 8 b) Bottom Image Backyard Farm PCR result on elctrophoresis Raw iMAGE

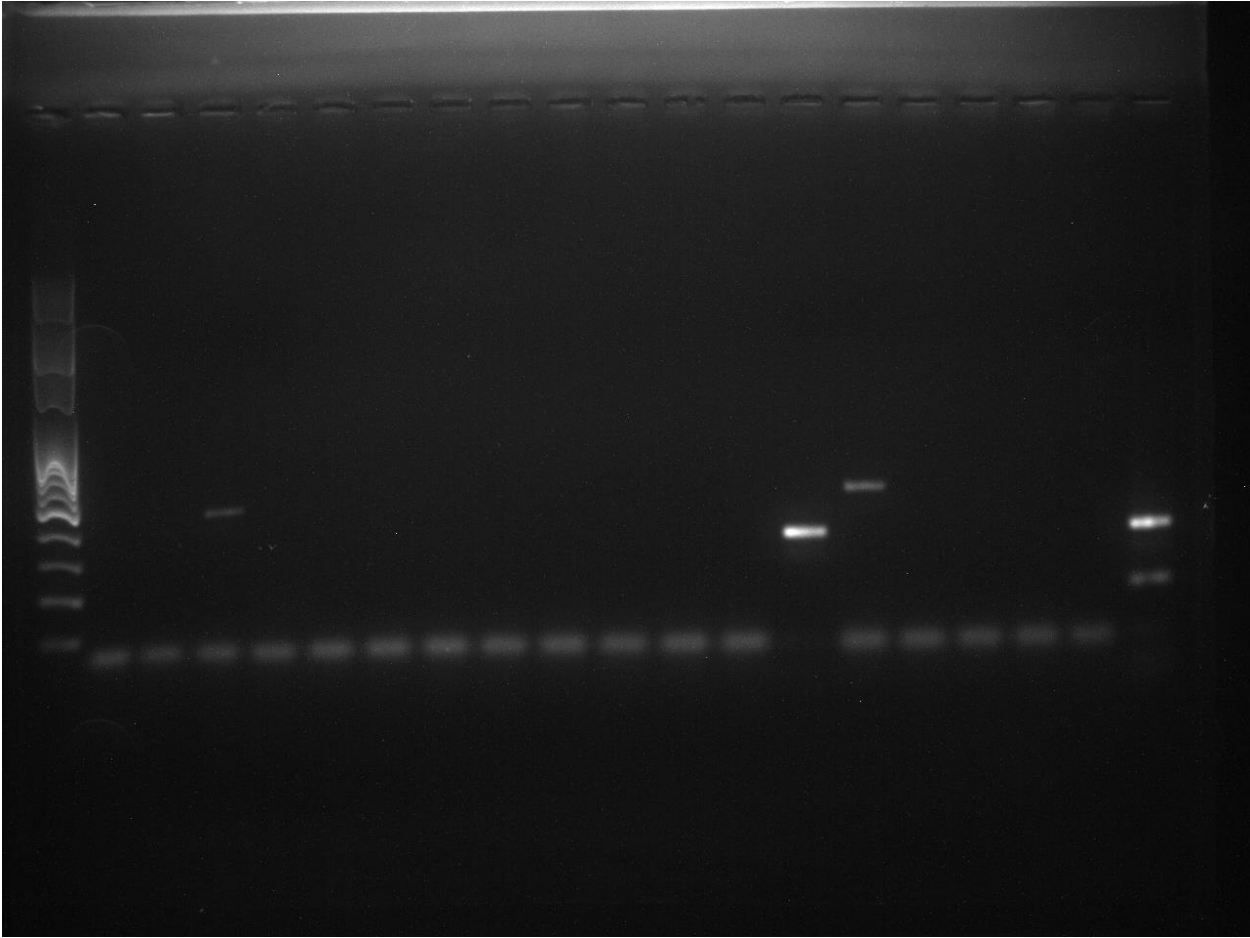

Supplement: pone.0280688.s003.pdf [file pone.0280688.s003.pdf]
